# Supplementary material for: An Investigation of Left Ventricular Valve Disorders and the Mechano-Electric Feedback Using a Synergistic Lumped Parameter Cardiovascular Numerical Model
Source: MDPI journal article supplement (doi:10.3390/bioengineering9090454), 2022-09-08
Supplement: s1 [file s1]

# Supplementary Materials: An Investigation of Left Ventricular Valve Disorders and the Mechano-Electric Feedback Using a Synergistic Lumped Parameter Cardiovascular Numerical Model

Nicholas Pearce \* and Eun-jin Kim

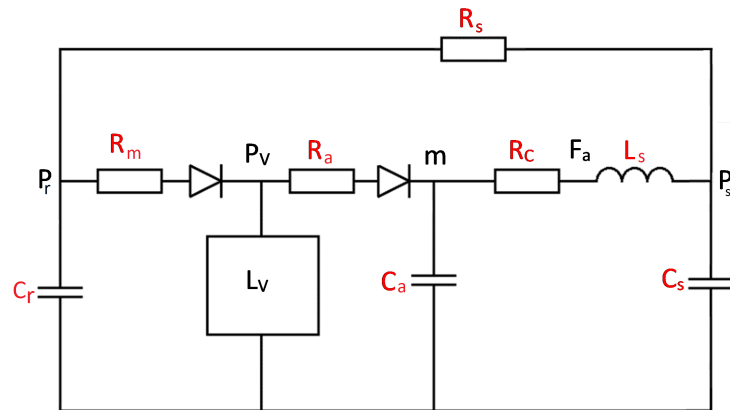

**Figure S1.** The equivalent electrical diagram of the complete cardiovascular system described. For abbreviation definitions refer to Table 3 in the main paper. The left atrium feeds blood at a pressure  $P_r$  through the mitral valve (the diode) into the left ventricle ( $L_v$ ). As the blood passes through the valve it encounters a resistance  $R_m$ . With the mitral valve closed the aortic valve (second diode) opens allowing blood at pressure  $P_v$  to flow into aorta encountering a valve resistance  $R_a$ . The aorta has a compliance  $C_a$ . The aortic blood at pressure  $m$  flows ( $F_a$ ) towards the remainder of the body encountering a characteristic resistance  $R_c$ . The blood has an inertia  $L_s$  due to its mass and encounters the resistance  $R_s$  and compliance  $C_s$  of the body's systemic arteries and tissues. The blood at pressure  $P_s$  after feeding the organs with fresh oxygen and nutrients is re-oxygenated and flows back to left atrium (with compliance  $C_r$ ) ready for another cycle.

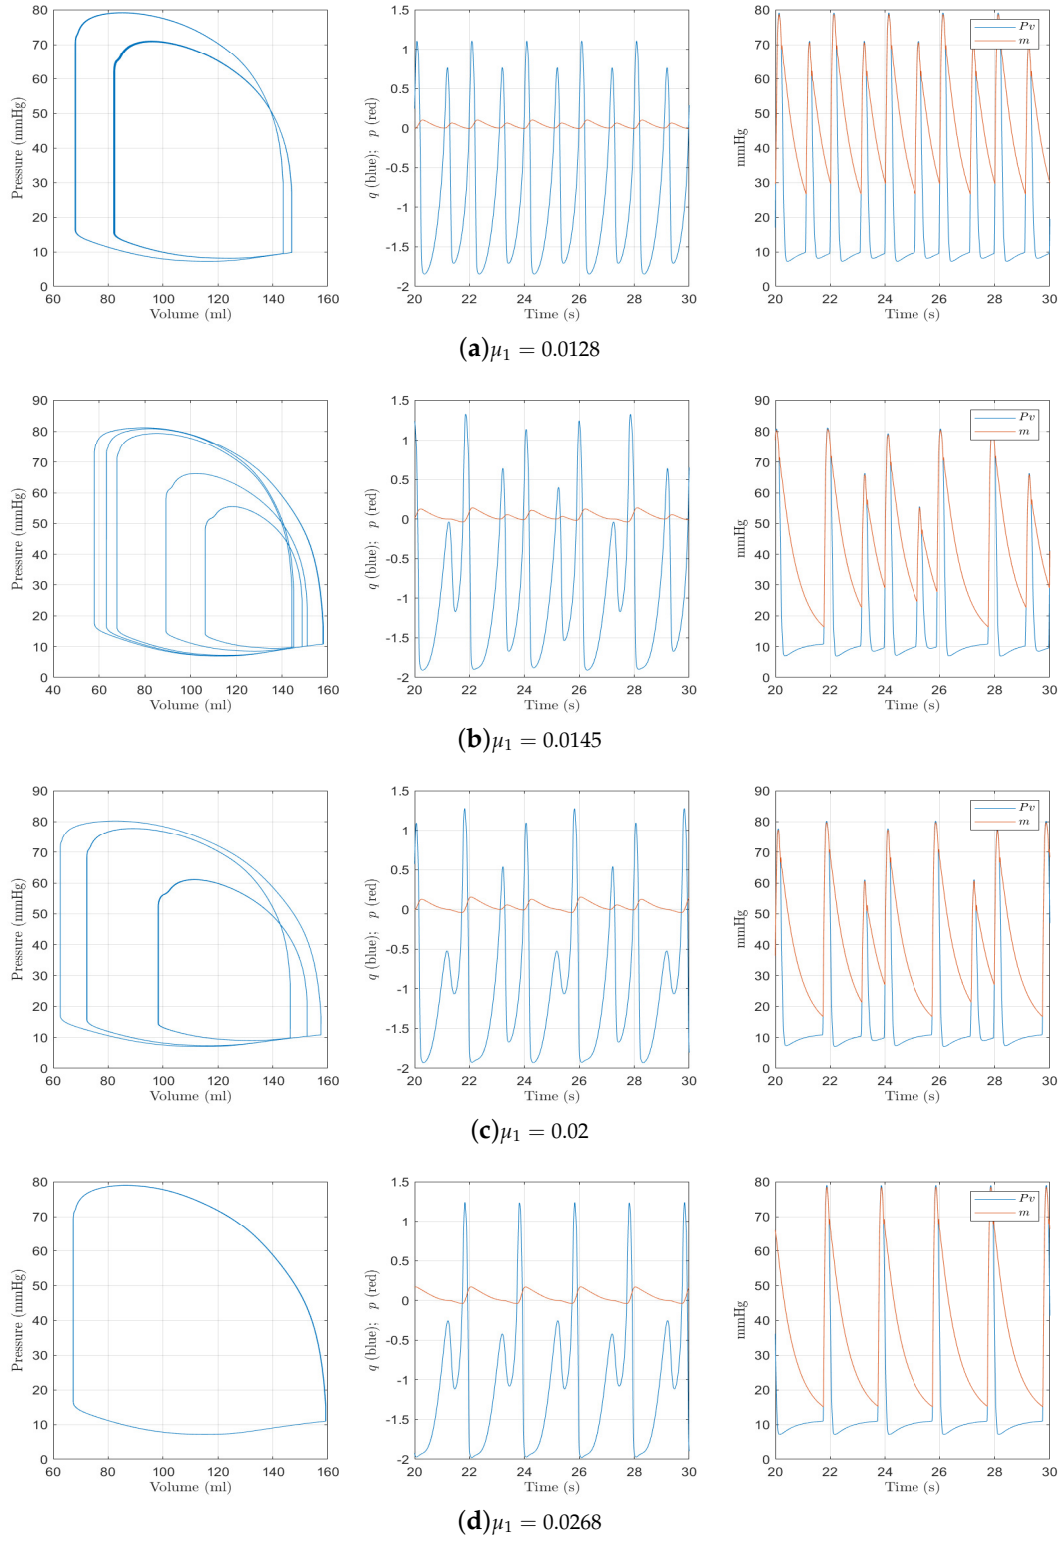

**Figure S2.** The effect of increasing  $\mu_1$  for the control case:  $\mu_1 = [0.0128, 0.0145, 0.020, 0.0268]$ .

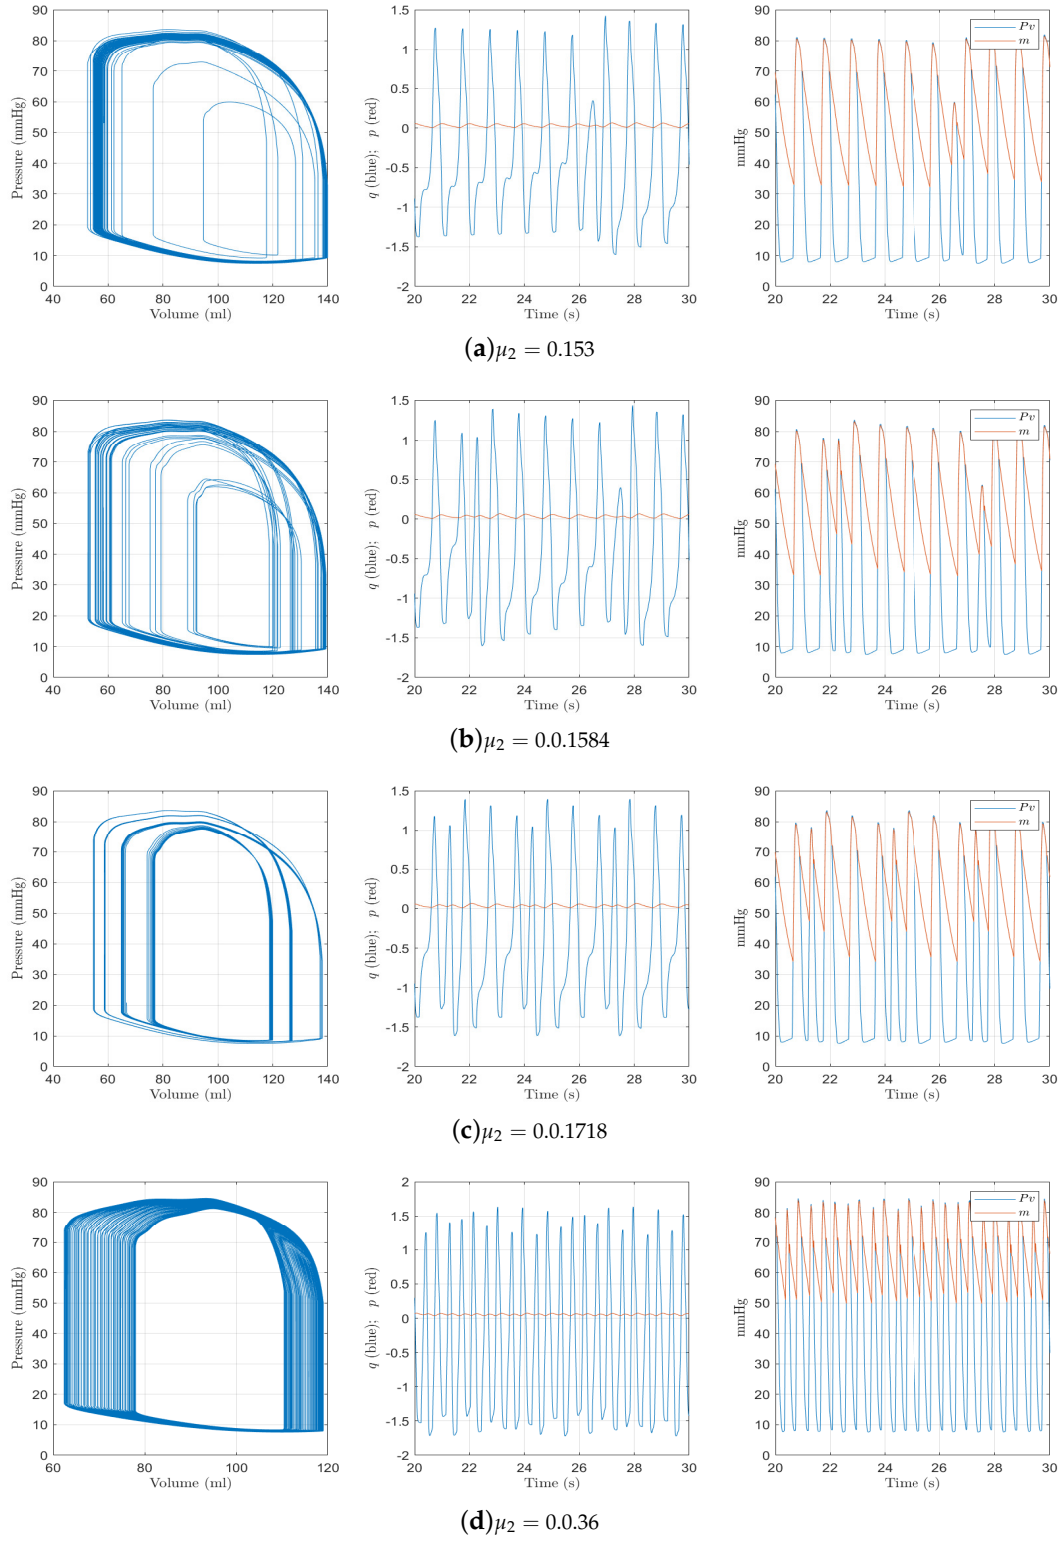

Figure S3. Cont.

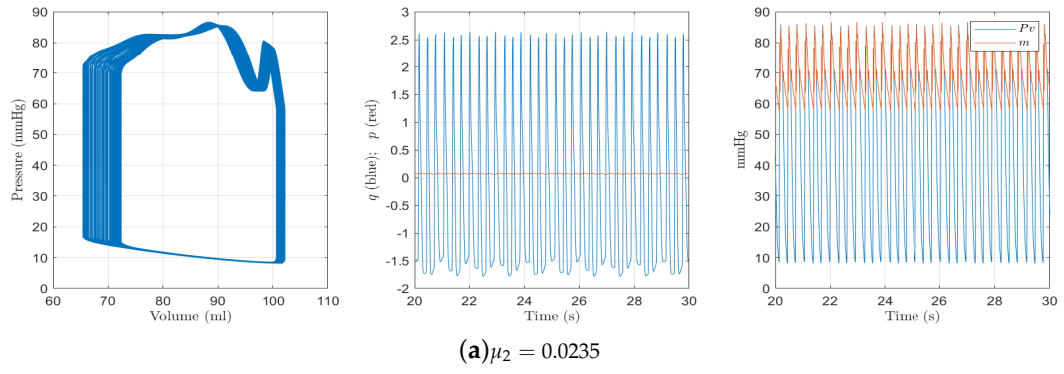

**Figure S3.** The effect of increasing  $\mu_2$  for the control case:  $\mu_2 = [0.153, 0.1584, 0.1718, 0.36, 1.8]$ .
